# Supplementary material
Source: MDPI journal article supplement (https://www.mdpi.com/search?q=brainsci-11-00270)
Supplement: s001 [file brainsci-11-00270-s001.pdf]

## Supplementary Materials

**Table S1.** LogMAR scores, mean reaction times and mean accuracy rates of individual patient before and after stimulation.

|             | LogMAR score before stimulation (log unit) |          | LogMAR score after stimulation (log unit) |          | RT before stimulation (sec) | RT after stimulation (sec) | AR before stimulation (%) | AR after stimulation (%) |
|-------------|--------------------------------------------|----------|-------------------------------------------|----------|-----------------------------|----------------------------|---------------------------|--------------------------|
|             | Right eye                                  | Left eye | Right eye                                 | Left eye |                             |                            |                           |                          |
| <b>Sham</b> |                                            |          |                                           |          |                             |                            |                           |                          |
| 1           | 2.30                                       | 3.00     | 1.90                                      | 3.00     | 1.200930426                 | 1.746164861                | 66.66                     | 56.66                    |
| 2           | 3.00                                       | 0.60     | 3.00                                      | 0.60     | 0.479694355                 | 0.428108942                | 86.66                     | 96.66                    |
| 3           | 1.00                                       | 0.40     | 1.00                                      | 0.46     | 0.744769603                 | 0.646360788                | 73.33                     | 83.33                    |
| 4           | 3.00                                       | 1.30     | 3.00                                      | 1.30     | 1.620026137                 | 1.269536318                | 83.33                     | 80                       |
| 5           | 2.70                                       | 0.70     | 2.70                                      | 0.70     | 0.317538964                 | 0.274474409                | 90                        | 90                       |
| 6           | 0.36                                       | 1.02     | 0.36                                      | 1.08     | 0.699528571                 | 0.502518114                | 66.66                     | 70                       |
| 7           |                                            |          |                                           |          | 0.597526901                 | 0.388824886                | 76.66                     | 76.66                    |
| 8           | 0.90                                       | 0.90     | 0.96                                      | 0.70     | 1.535388639                 | 1.148447791                | 63.33                     | 70                       |
| 9           | 3.00                                       | 0.70     | 3.00                                      | 0.66     | 1.930688555                 | 1.947173265                | 50                        | 46.66                    |
| 10          | 1.00                                       | 1.30     | 0.90                                      | 1.00     | 2.15674003                  | 1.577645105                | 73.33                     | 86.66                    |
| 11          | 2.30                                       | 0.50     | 2.30                                      | 0.50     | 2.151882079                 | 1.9172486                  | 86.66                     | 83.33                    |
| 12          | 2.30                                       | 3.00     | 1.90                                      | 3.00     | 1.200930426                 | 1.746164861                | 66.66                     | 56.66                    |
| <b>tDCS</b> |                                            |          |                                           |          |                             |                            |                           |                          |
| 1           | 0.46                                       | 1.90     | 0.30                                      | 1.90     | 0.623135621                 | 0.584139039                | 66.66                     | 66.66                    |
| 2           | 0.90                                       | 1.90     | 0.90                                      | 1.90     | 4.233880479                 | 2.30780711                 | 76.66                     | 80                       |
| 3           | 1.90                                       | 0.66     | 1.90                                      | 0.46     | 0.820385531                 | 0.575180381                | 63.33                     | 76.66                    |
| 4           | 0.50                                       | 2.30     | 0.20                                      | 2.30     | 3.422959293                 | 1.461458293                | 50                        | 36.66                    |
| 5           | 0.40                                       | 0.60     | 0.30                                      | 0.30     | 1.896772719                 | 0.961491378                | 86.66                     | 96.66                    |
| 6           | 0.36                                       | 0.38     | 0.30                                      | 0.32     | 2.077262805                 | 1.056846863                | 96.66                     | 90                       |
| 7           | 0.40                                       | 1.30     | 0.40                                      | 1.30     | 2.283729186                 | 1.096498092                | 70                        | 86.66                    |
| 8           | 1.36                                       | 1.46     | 0.90                                      | 1.00     | 3.490134569                 | 2.310843279                | 83.33                     | 80                       |
| 9           | 1.30                                       | 0.40     | 1.00                                      | 0.40     | 1.377072078                 | 1.63864993                 | 86.66                     | 83.33                    |
| 10          | 0.36                                       | 0.20     | 0.12                                      | 0.20     | 0.623907453                 | 0.609495288                | 90                        | 73.33                    |
| 11          | 3.00                                       | 2.70     | 3.00                                      | 2.70     | 6.37358256                  | 1.889200617                | 46.66                     | 53.33                    |
| 12          | 0.46                                       | 1.90     | 0.30                                      | 1.90     | 0.623135621                 | 0.584139039                | 66.66                     | 66.66                    |

LogMAR, Logarithm of the Minimum Angle of Resolution; tDCS, Transcranial direct current stimulation; RT, Reaction time; AR, Accuracy rate.
